# Supplementary material
Source: publisher figshare collection journal article supplement (https://acs.figshare.com/ndownloader/files/4644535)
Supplement: Supplementary file 1 [file 4644535]

# Utilizing the lability of lead selenide to produce heterostructured nanocrystals with bright, stable infrared emission

*Jeffrey M. Pietryga, Donald J. Werder, Darrick J. Williams<sup>1</sup>, Joanna L. Casson, Richard D. Schaller,*

*Victor I. Klimov and Jennifer A. Hollingsworth\**

Chemistry Division, Los Alamos National Laboratory, Los Alamos, New Mexico, 87545; <sup>1</sup>Center for

Integrated Nanotechnologies, Los Alamos National Laboratory, Los Alamos, New Mexico, 87545

Corresponding author email address: [jenn@lanl.gov](mailto:jenn@lanl.gov)

## **Supporting Information**

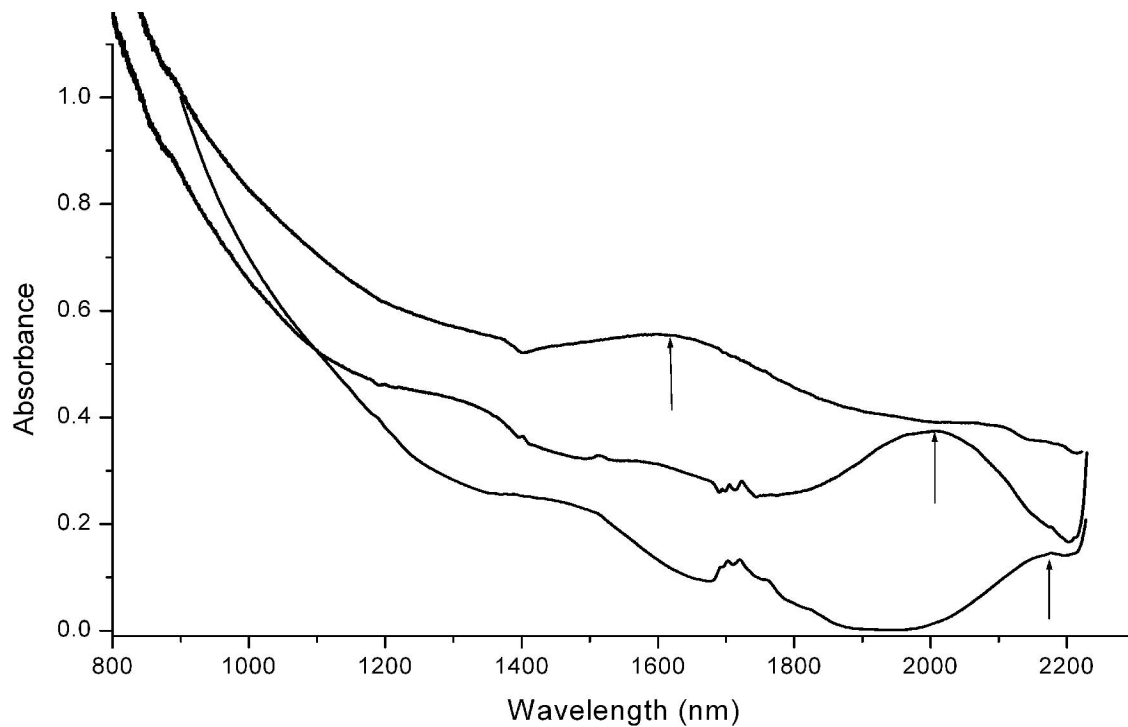

**Figure S-1.** Absorption spectra corresponding to PL spectra depicted in **Figure 1**. Arrows indicate location of 1s absorption features, which shifts to lower wavelengths as one goes from no shell (bottom) to a 0.7 nm shell (middle) and to a 1.4 nm shell (top). A consistent Stokes shifts of ~40 nm was found in each case.

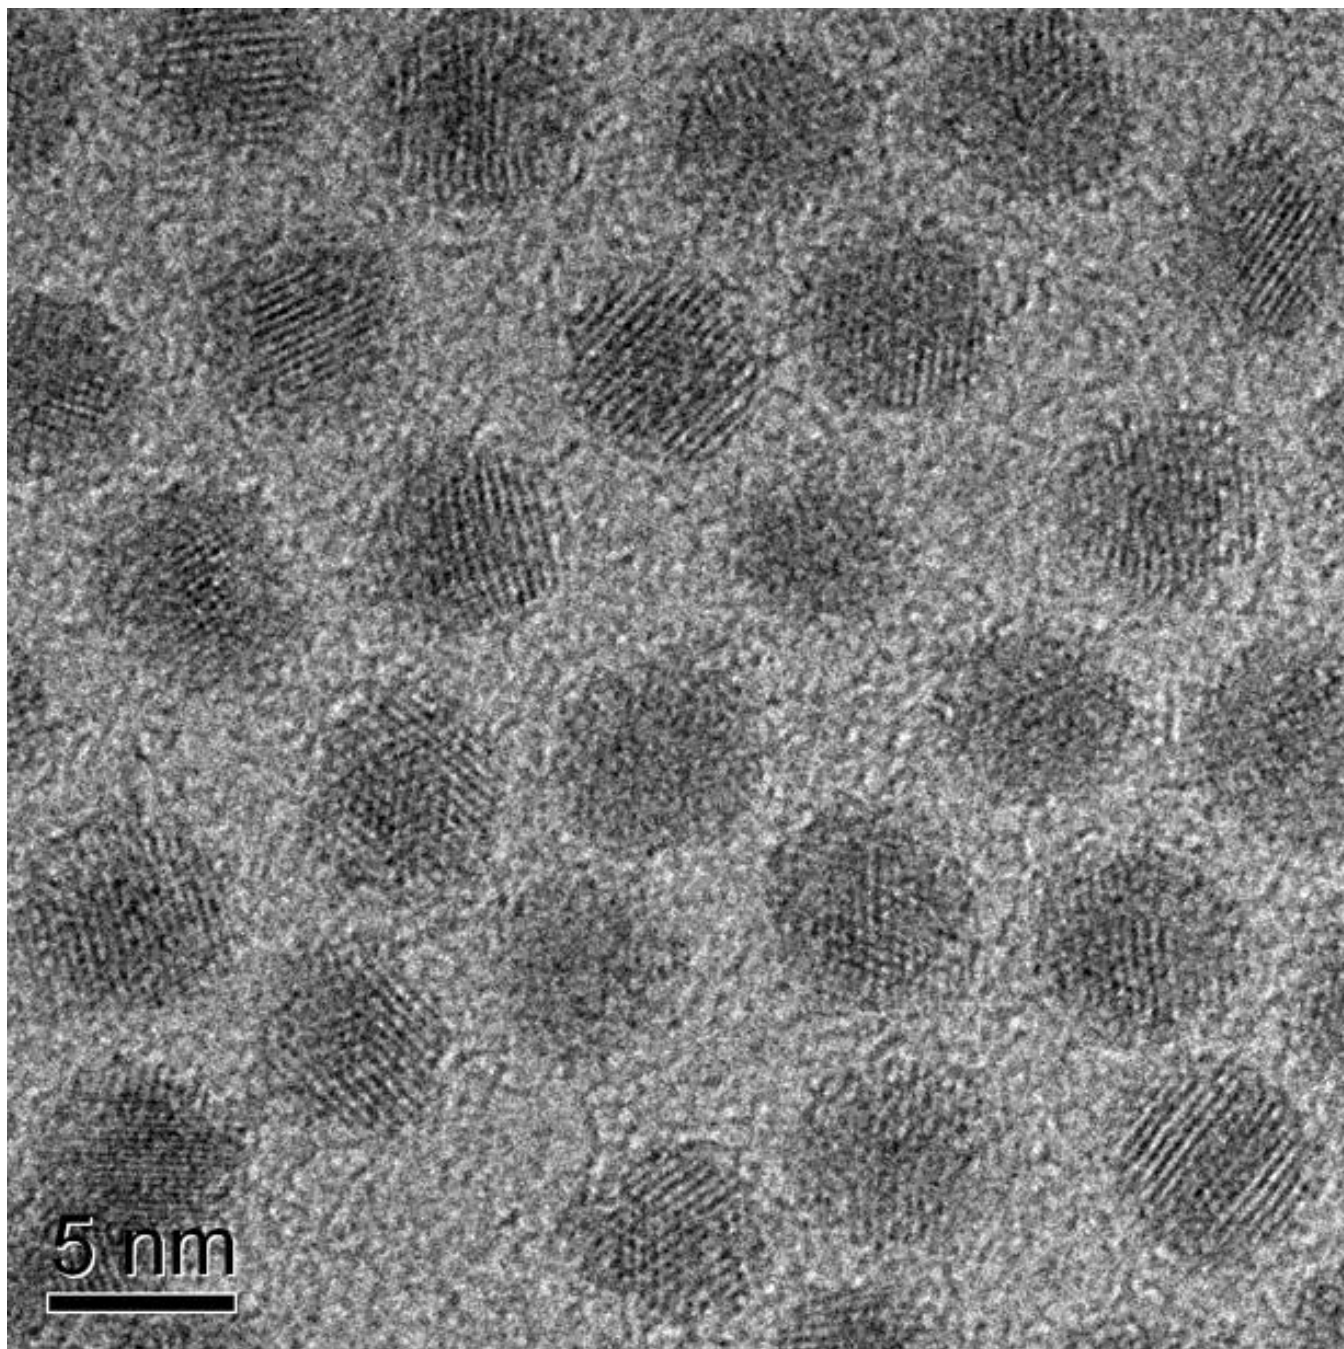

**Figure S-2.** HRTEM image of PbSe/CdSe NQDs showing discontinuous domains of PbSe and CdSe. CdSe lattice fringes from a relatively thick shell often obscure the PbSe core lattice fringes, but the discontinuous nature of the core/shell alignment is apparent in several individual NQDs.

| SAMPLE ID     | LAB ID | ANALYSIS   | RESULTS |     | RETEST RESULTS |    |
|---------------|--------|------------|---------|-----|----------------|----|
| JMP-1278-1    | B-8296 | Lead       | 9.32    | %   |                |    |
|               |        | Cadmium    | 3.37    | %   |                |    |
|               |        | Selenium   | 5.04    | %   |                |    |
|               |        | Carbon     | 16.00   | %   |                |    |
| JMP-1278-2    | B-8297 | Lead       | 13.9    | %   |                |    |
|               |        | Cadmium    | 7.20    | %   |                |    |
|               |        | Selenium   | 8.90    | %   |                |    |
|               |        | Carbon     | 15.52   | %   |                |    |
| JMP-1278-3    | B-8298 | Lead       | 33.9    | %   | 81.7           | µg |
|               |        | Cadmium    | 36.5    | %   | 83.9           | µg |
|               |        | Selenium   | 31.1    | %   | 79.3           | µg |
|               |        | Phosphorus | 414     | ppm | <1.3           | µg |
|               |        | Carbon     | 21.09   | %   |                |    |
| JMP-1278-CORE | B-8299 | Lead       | 20.1    | %   |                |    |
|               |        | Selenium   | 6.43    | %   |                |    |
|               |        | Phosphorus | 455     | ppm |                |    |
|               |        | Carbon     | 15.43   | %   |                |    |

**Table S-1.** Full elemental analysis report from Galbraith Laboratories on aliquots taken during CdSe shell formation. Concentrations of selected elements were determined by ICP-OES. JMP-1278-CORE, JMP-1278-1, JMP-1278-2 and JMP-1278-3 refer to the four samples depicted in **Figure 1**, progressing from no CdSe shell to the thickest CdSe shell.

| SAMPLE ID | LAB ID | ANALYSIS     | RESULT(S) |     |
|-----------|--------|--------------|-----------|-----|
| Core      | C-5465 | Lead         | 11.2      | %   |
|           |        | Cadmium      | 30.0      | %   |
|           |        | Zinc         | 169       | ppm |
|           |        | Selenium     | 21.2      | %   |
|           |        | Sulfur (ICP) | 375       | ppm |
| 4         | C-5466 | Lead         | 9.03      | %   |
|           |        | Cadmium      | 25.1      | %   |
|           |        | Zinc         | 11.0      | %   |
|           |        | Selenium     | 17.1      | %   |
|           |        | Sulfur (ICP) | 5.37      | %   |

**Table S-2.** Full elemental analysis report from Galbraith Laboratories on PbSe/CdSe (denoted “Core”) and PbSe/CdSe/ZnS (“4”) NQDs depicted in **Figure 6 (a. and c., respectively)**. Concentrations of selected elements were determined by ICP-OES.
